# Supplementary material
Source: publisher site journal article supplement (https://www.dovepress.com/article/303884)
Supplement: Supplementary file 1 [file get_supplementary_file.php]

**LIST OF Supplementary data**

**Supplementary data 1: Table S1.** Baseline characteristics and treatment pattern at Year 1 in safety set and primary treated eye set of patients with PCV

**Supplementary data 2: Figure S1. Mean change in central retinal thickness at Month 12 in primary treated eye set by pre-treatment status**

**Supplementary data 3: Figure S2. Mean change in central retinal thickness at Month 12 in primary treated eye set by PCV status**

**Supplementary data 4: Table S2.** Patients with ocular and non-ocular adverse events at 5 years: Safety and primary treated eye set

**Supplementary data 5: Table S3.** Adverse events suspected to be related to ranibizumab treatment and/or ocular injection over a 5-year period in the primary treated eye set

**Supplementary data 6: Table S4.** Patients with ocular and non-ocular adverse events at 1 years: Safety and primary treated eye set

**Supplementary data 7: Table S5.** The LUMINOUS study investigators from South Korea

**Table S1.** Baseline characteristics and treatment pattern at Year 1 in safety set and primary treated eye set of patients with PCV

|                                     | Treatment-naïve |                  | <i>P value</i> | Prior-treated |                  | <i>P value</i> |
|-------------------------------------|-----------------|------------------|----------------|---------------|------------------|----------------|
| Characteristics                     | PCV<br>n=48     | Non-PCV<br>n=104 |                | PCV<br>n=57   | Non-PCV<br>n=158 |                |
| <b>Patient demographics</b>         |                 |                  |                |               |                  |                |
| Mean (SD) age, years                | 68.4 (8.2)      | 73.9 (9.2)       | 0.0006         | 68.7 (8.2)    | 71.8 (8.1)       | 0.0161         |
| Gender, n (%)                       |                 |                  |                |               |                  |                |
| Male                                | 34 (70.8)       | 69 (66.4)        | 0.5822         | 44 (77.2)     | 100 (63.3)       | 0.0557         |
| <b>Ocular characteristics</b>       |                 |                  |                |               |                  |                |
| CNV type, n (%)                     |                 |                  | 0.0156         |               |                  | 0.0053         |
| Predominantly classic               | 6 (12.5)        | 32 (30.8)        |                | 5 (8.8)       | 42 (26.6)        |                |
| Minimally classic/occult            | 42 (87.5)       | 72 (69.2)        |                | 52 (91.2)     | 116 (73.4)       |                |
| PED, n (%)                          | 33 (68.8)       | 73 (70.2)        | 0.8572         | 35 (61.4)     | 104 (65.8)       | 0.5496         |
| RAP, n (%)                          | 1 (2.1)         | 5 (4.8)          | 0.4227         | 2 (3.5)       | 4 (2.5)          | 0.7010         |
| Lesion size, %                      |                 |                  | 0.8596         |               |                  | 0.8008         |
| ≤1 DA                               | 15 (31.3)       | 34 (32.7)        |                | 22 (38.6)     | 64 (40.5)        |                |
| >1 DA                               | 33 (68.8)       | 70 (67.3)        |                | 35 (61.4)     | 94 (59.5)        |                |
| <b>VA</b>                           |                 |                  |                |               |                  |                |
| n                                   | 47              | 100              |                | 47            | 146              |                |
| Mean (SD) VA, ETDRS letters         | 49.0 (24.37)    | 40.4 (26.83)     | 0.0630         | 58.5 (17.13)  | 52.9 (22.34)     | 0.0732         |
| <b>CRT</b>                          |                 |                  |                |               |                  |                |
| n                                   | 43              | 88               |                | 40            | 123              |                |
| Mean (SD) CRT, μm                   | 396.2 (156.18)  | 415.5 (147.81)   | 0.1003         | 289.6 (80.61) | 288.6 (88.72)    | 0.9472         |
| <b>IOP</b>                          |                 |                  |                |               |                  |                |
| n                                   | 45              | 80               |                | 46            | 132              |                |
| Mean (SD), mmHg                     | 13.6 (3.38)     | 14.1 (3.95)      | 0.4487         | 14.5 (3.35)   | 14.5 (3.55)      | 0.9321         |
| <b>Treatment pattern</b>            |                 |                  |                |               |                  |                |
| Median time from diagnosis to first | 3.5             | 5.0              |                | 278.0         | 176.5            |                |
|                                     |                 |                  | 0.1304         |               |                  | 0.1998         |

|                        |          |         |          |          |
|------------------------|----------|---------|----------|----------|
| <b>treatment, days</b> | (1.00,   | (1.00.  | (1.00.   | (1.00.   |
| <b>(min, max)</b>      | 3062.00) | 218.00) | 3565.00) | 4075.00) |

Indication and pre-treatment status refers to the primary treated eye

The safety set comprised patients in the enrolled set who were treated with at least one dose of ranibizumab during the study or prior to study initiation and had at least one safety assessment post-initial treatment.

Primary treated eye set included all primary treated eyes in patients included in the safety set

Patients with a baseline visit date on or before March 2015 are included. Data collected until the last recorded follow-up date were used to perform the analyses

Two-sided student's t-test was performed to compare the baseline demographics and patient characteristics between PCV and non-PCV patients.

CRT, central retinal thickness; DA, disc area; ETDRS, Early Treatment Diabetic Retinopathy Study; IOP, intraocular pressure; N, total number of patients; n, number of patients; nAMD, neovascular age-related macular degeneration; PCV, polypoidal choroidal vasculopathy; SD, standard deviation

**Figure S1.** Mean change in CRT at M12 in primary treated eye set by pre-treatment status

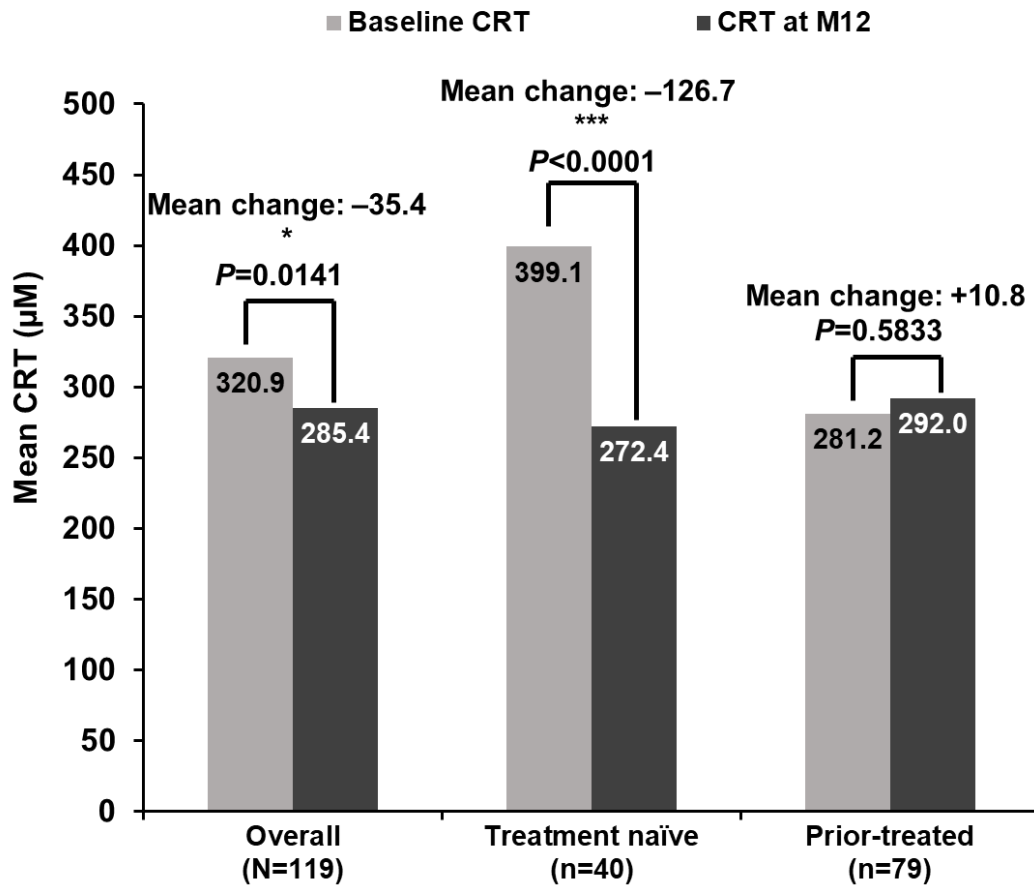

Primary treated eye set included all primary treated eyes in patients included in the safety set  
 Statistical analyses were performed using two-sample student's t-tests to compare CRT between baseline and Year 1. \* $P<0.05$ , \*\*\* $P<0.001$

CRT, central retinal thickness; N, total number of patients; n, number of patients; M, month, PCV, polypoidal choroidal vasculopathy

**Figure S2.** Mean change in CRT at M12 in primary treated eye set by PCV status

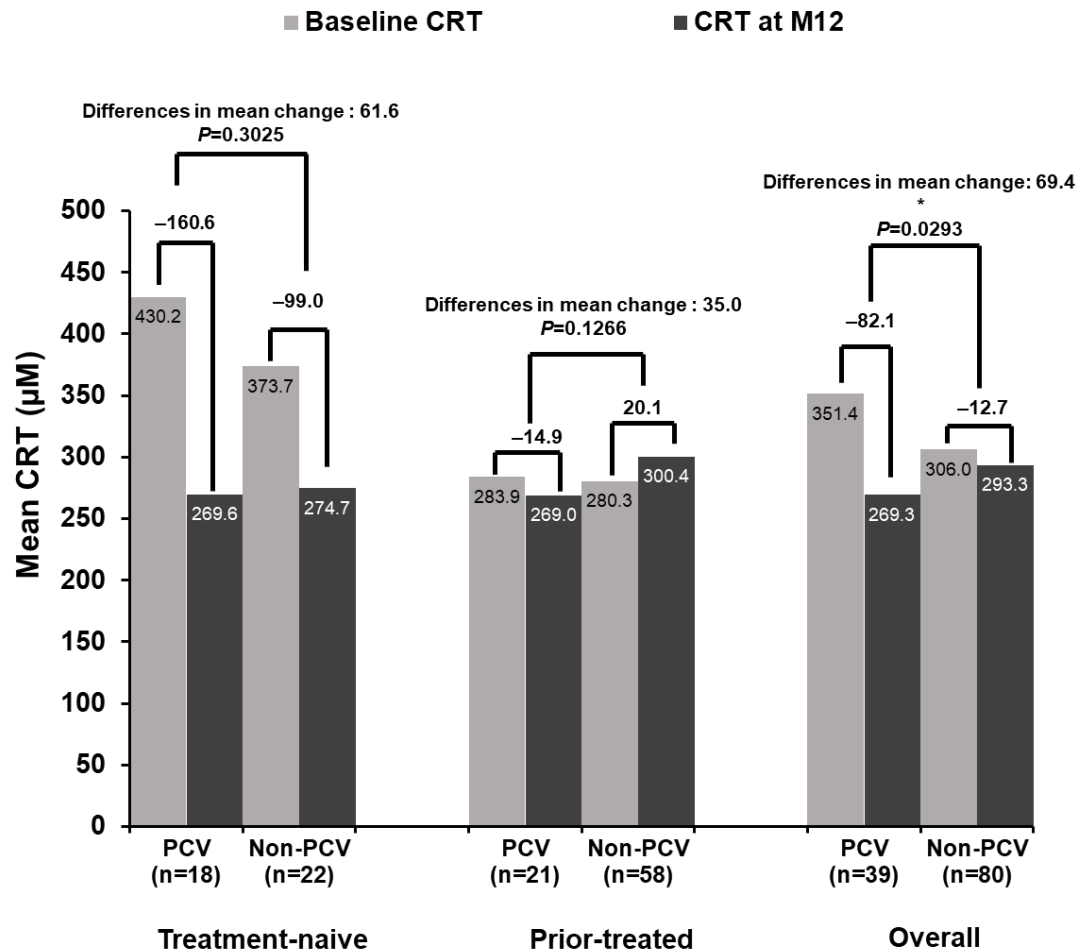

Primary treated eye set included all primary treated eyes in patients included in the safety set  
Two-sample student's t-test was performed to compare the mean change in VA between patients with/without PCV

CRT, central retinal thickness; n, number of patients; M, month, PCV, polypoidal choroidal vasculopathy; VA, visual acuity

**Table S2.** Patients with ocular and non-ocular adverse events (5 years): Safety and primary treated eye set

| <b>Preferred term, n (%)</b>          | <b>Treatment-naïve<br/>n=152</b> | <b>Prior-treated<br/>n=215</b> | <b>Total<br/>N=367</b> |
|---------------------------------------|----------------------------------|--------------------------------|------------------------|
| <b>Ocular AEs, total</b>              | <b>16 (10.5)</b>                 | <b>15 (7.0)</b>                | <b>31 (8.4)</b>        |
| Cataract                              | 3 (2.0)                          | 5 (2.3)                        | 8 (2.2)                |
| Conjunctival<br>haemorrhage           | 4 (2.6)                          | 1 (0.5)                        | 5 (1.4)                |
| Dry eyes                              | 3 (2.0)                          | 2 (0.9)                        | 5 (1.4)                |
| Conjunctivitis<br>allergic            | 3 (2.0)                          | 1 (0.5)                        | 4 (1.1)                |
| Posterior<br>capsule<br>opacification | 2 (1.3)                          | 0 (0.0)                        | 2 (0.5)                |
| Vitreous<br>haemorrhage               | 2 (1.3)                          | 0 (0.0)                        | 2 (0.5)                |
| <b>Non-ocular AEs, total</b>          | <b>18 (11.8)</b>                 | <b>19 (8.8)</b>                | <b>37 (10.1)</b>       |
| Gastric ulcer                         | 2 (1.3)                          | 0 (0.0)                        | 2 (0.5)                |
| Large intestine<br>polyp              | 0 (0.0)                          | 2 (0.9)                        | 2 (0.5)                |
| Herpes zoster<br>infection            | 2 (1.3)                          | 1 (0.5)                        | 3 (0.8)                |
| Dizziness                             | 2 (1.3)                          | 0 (0.0)                        | 2 (0.5)                |
| Headache                              | 1 (0.7)                          | 1 (0.5)                        | 2 (0.5)                |
| Diabetes<br>mellitus                  | 0 (0.0)                          | 2 (0.9)                        | 2 (0.5)                |
| Anaemia                               | 1 (0.7)                          | 1 (0.5)                        | 2 (0.5)                |
| Insomnia                              | 2 (1.3)                          | 0 (0.0)                        | 2 (0.5)                |
| Hypertension                          | 0 (0.0)                          | 2 (0.9)                        | 2 (0.5)                |

Ocular AEs were assessed for the primary treated eye set and non-ocular AEs were assessed for the safety set

The safety set comprised patients in the enrolled set who were treated with at least one dose of ranibizumab during the study or prior to study initiation and had at least one safety assessment post-initial treatment.

Primary treated eye set included all primary treated eyes in patients included in the safety set

Indication and pre-treatment status refers to the primary treated eye. Only AEs occurring during the safety observation period are included. Preferred terms are presented by descending order of frequency in the total column. A patient with multiple occurrences of an AE was counted once per preferred term. A patient with multiple AEs is counted only once in the total row. Patients with a baseline visit date present are included. Data collected until the last recorded follow-up date were used to perform the analyses. Total ocular and non-ocular AEs >2 in number are shown

AE, adverse event; N, total number of patients; n, number of patients

**Table S3.** AEs suspected to be related to ranibizumab treatment and/or ocular injection over a 5-year period in the primary treated eye set

| <b>Preferred term, n (%)</b> | <b>Treatment-naïve<br/>n=152</b> | <b>Prior-treated<br/>n=215</b> | <b>Total<br/>n=367</b> |
|------------------------------|----------------------------------|--------------------------------|------------------------|
| <b>Ocular AEs, total</b>     | <b>3 (2.0)</b>                   | <b>0 (0.0)</b>                 | <b>3 (0.8)</b>         |
| Conjunctival<br>haemorrhage  | 3 (2.0)                          | 0 (0.0)                        | 3 (0.8)                |
| Cataract                     | 1 (0.7)                          | 0 (0.0)                        | 1 (0.3)                |

The primary treated eye set included all primary treated eyes in patients included in the safety set  
Indication and pre-treatment status refers to the primary treated eye. Only AEs occurring during the safety observation period are included. Preferred terms are presented by descending order of frequency in the total column. A patient with multiple occurrences of an AE was counted once per preferred term. A patient with multiple AEs is counted only once in the total row. Patients with a baseline visit date present are included. Data collected until the last recorded follow-up date were used to perform the analyses  
AE, adverse event; n, number of patients



**Table S4.** Patients with ocular and non-ocular AEs (1 year): Safety and primary treated eye set

| <b>Preferred term, n (%)</b>    | <b>Treatment-naïve<br/>n=152</b> | <b>Prior-treated<br/>n=215</b> | <b>Total<br/>N=367</b> |
|---------------------------------|----------------------------------|--------------------------------|------------------------|
| <b>Ocular AEs, total</b>        | <b>12 (7.9)</b>                  | <b>11 (5.1)</b>                | <b>23 (6.3)</b>        |
| Cataract                        | 1 (0.7)                          | 4 (1.9)                        | 5 (1.4)                |
| Conjunctival hemorrhage         | 4 (2.6)                          | 1 (0.5)                        | 5 (1.4)                |
| Dry eyes                        | 2 (1.3)                          | 2 (0.9)                        | 4 (1.1)                |
| Conjunctivitis allergic         | 2 (1.3)                          | 1 (0.5)                        | 3 (0.8)                |
| Posterior capsule opacification | 2 (1.3)                          | 0 (0.0)                        | 2 (0.5)                |
| <b>Non-ocular AEs, total</b>    | <b>14 (9.2)</b>                  | <b>12 (5.6)</b>                | <b>26 (7.1)</b>        |
| Herpes zoster infection         | 2 (1.3)                          | 0 (0.0)                        | 2 (0.5)                |
| Dizziness                       | 1 (0.7)                          | 0 (0.0)                        | 1 (0.3)                |
| Headache                        | 1 (0.7)                          | 1 (0.5)                        | 2 (0.5)                |
| Diabetes mellitus               | 0 (0.0)                          | 2 (0.9)                        | 2 (0.5)                |
| Anaemia                         | 1 (0.7)                          | 0 (0.0)                        | 1 (0.3)                |
| Insomnia                        | 1 (0.7)                          | 0 (0.0)                        | 1 (0.3)                |

Ocular AEs were assessed for the primary treated eye set and non-ocular AEs were assessed for the safety set

The safety set comprised patients in the enrolled set who were treated with at least one dose of ranibizumab during the study or prior to study initiation and had at least one safety assessment post-initial treatment.

Primary treated eye set included all primary treated eyes in patients included in the safety set

Indication and pre-treatment status refers to the primary treated eye. Only AEs occurring during the safety observation period are included. Preferred terms are presented by descending order of frequency in the total column. A patient with multiple occurrences of an AE was counted once per preferred term. A patient with multiple AEs is counted only once in the total row. Patients with a baseline visit date present are included.

Data collected until the last recorded follow-up date were used to perform the analyses

AE, adverse event; N, total number of patients; n, number of patients

**Table S5.** The LUMINOUS study investigators from South Korea

| <b>Investigator</b> | <b>Affiliation</b>                                                                |
|---------------------|-----------------------------------------------------------------------------------|
| Dr Hakyoung Kim     | Hallym University Kangnam Sacred Heart Hospital, Seoul, 150-950, Korea            |
| Dr So Hyun Bae      |                                                                                   |
| Dr Hyeong-Gon Yu    | Seoul National University Hospital, Seoul, Gyeonggi-do, 110744, Korea             |
| Dr Jang-Won Heo     |                                                                                   |
| Dr Joo Young Shin   |                                                                                   |
| Dr In Hwan Cho      |                                                                                   |
| Dr Hyoung Jun Koh   | Gangnam Severance Hospital, Yonsei University Health System, Seoul, 062 73, Korea |
| Dr Yong Woo Ji      |                                                                                   |
| Dr Hyun Woong Kim   | Inje University Busan Paik Hospital, Busan, 47392, Korea                          |
| Dr Young Jin Kim    |                                                                                   |
| Dr Seung-Young Yu   | Kyung Hee University Hospital, Seoul, 024 47, Korea                               |
| Dr Yonguk Kim       |                                                                                   |
| Dr Minseok Kang     |                                                                                   |
| Dr Kyunghoon Seo    |                                                                                   |
| Dr Kiyoun Kim       |                                                                                   |
| Dr In Taek Kim      | Kyungpook National University Hospital, Daegu, Gyeongsangbuk-do, 700-721, Korea   |
| Dr Dong Jin Kang    |                                                                                   |
| Dr Soo Hyun Kwon    |                                                                                   |
| Dr Ji Eun Lee       | Pusan National University Hospital, Busan, 602-739, Korea                         |
| Dr Sung Who Park    |                                                                                   |
| Dr Kang Yeun Pak    |                                                                                   |
| Dr Ji Hun Song      | Ajou University Hospital, Suwon-si, Gyeonggi-do, 16499, Korea                     |
| Dr IISuk Yun        |                                                                                   |
| Dr Seran Jang       |                                                                                   |
| Dr Hosung Jin       |                                                                                   |
| Dr Eoijong Seo      |                                                                                   |
| Dr Jong Wan Kim     |                                                                                   |
| Dr June-Gone Kim    | Asan Medical Center, Seoul, 055 05, Korea                                         |
| Dr Joo Yong Lee     |                                                                                   |
| Dr Yoon Jeon Kim    |                                                                                   |

|                    |                                                                                       |
|--------------------|---------------------------------------------------------------------------------------|
| Dr Kyu Hyung Park  | Seoul National University Bundang Hospital,<br>Seongnam-si, Gyeonggi-do, 13620, Korea |
| Dr SeJoon Woo      |                                                                                       |
| Dr Hye Kyoung Hong |                                                                                       |
| Dr SeWoong Kang    | Samsung Medical Center, Seoul, 063 51, Korea                                          |
| Dr SangJin Kim     |                                                                                       |
| Dr Ga Eun Cho      |                                                                                       |
| Dr Jongmin Kim     |                                                                                       |
| Dr Won Ki Lee      | The Catholic University of Korea, Seoul St. Mary's<br>Hospital, Seoul, 137-701, Korea |
| Dr Jae Hyung Lee   |                                                                                       |
| Dr Min Sagong      | Yeungnam University Hospital, Daegu, 42415,<br>Korea                                  |
| Dr Woohyok Chang   |                                                                                       |
| Dr Jongwoo Kim     | Kim's Eye Hospital, 136, Yeongshin-ro,<br>Yeongdeungpo-gu, Seoul, South Korea         |
| Dr Sung Won Cho    |                                                                                       |
| Dr Jungil Han      |                                                                                       |
| Dr JooYeon Kim     |                                                                                       |
